# Supplementary material for: Long non-coding RNA HOTAIR functions as a competitive endogenous RNA to regulate PRAF2 expression by sponging miR-326 in cutaneous squamous cell carcinoma
Source: Springer Nature journal article supplement (doi:10.1186/s12935-019-0992-x), 2019-10-21
Supplement: MOESM1 [file 17296360]

**Figure S1**

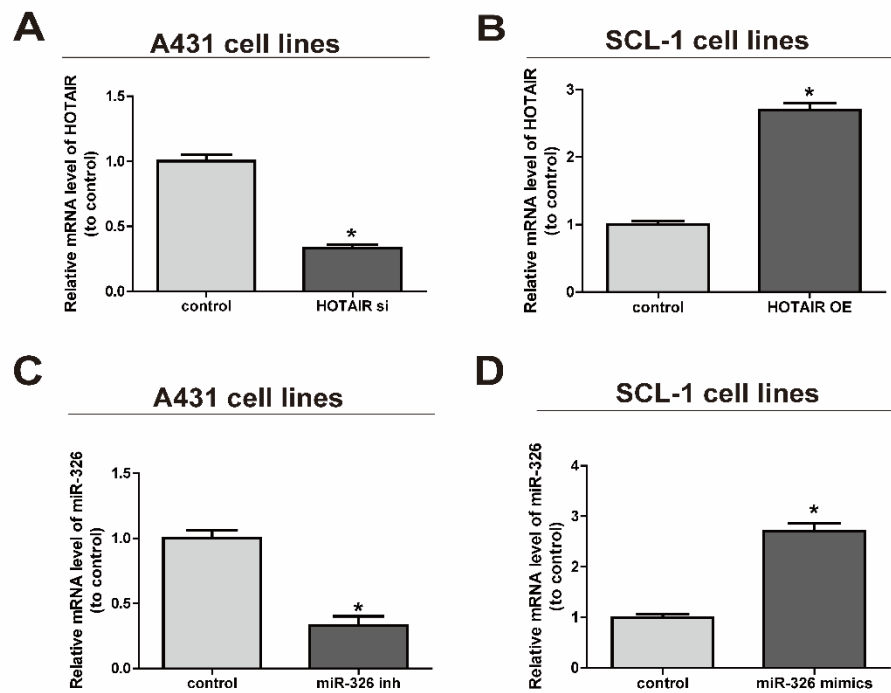

**Figure S1 Transfection efficiency.** (A) qRT-PCR was used to identify the effect of *HOTAIR* siRNA in A431 cells. (B) The mRNA level of *HOTAIR* in SCL-1 cells treated with *HOTAIR* over-expressing vector was detected by qRT-PCR. (C) qRT-PCR was used to identify the effect of miR-326 inhibitor in A431 cells. (D) The mRNA level of miR-326 was detected by qRT-PCR after transfection with miR-326 mimics. The data are presented as mean  $\pm$  s.d. \* $P \leq 0.05$ , Student's t-test.
